# Supplementary material
Source: Elsevier journal article supplement (https://www.sciencedirect.com/science/article/pii/S1130862122000882)
Supplement: mmc1 [file S1130862122000882:mmc1.pdf]

## Conhecimentos e atitudes dos enfermeiros perante a higiene oral à pessoa em situação de dependência

Código:

### Parte I - Caracterização sociodemográfica

1. Idade \_\_\_\_\_ anos      Sexo:    Feminino ☐      Masculino ☐

---

2. Tempo de exercício profissional como enfermeiro \_\_\_\_\_ (anos completos)

3. Título profissional:
- ☐ Enfermeiro
  - ☐ Enf. Esp. em Enfermagem Comunitária
  - ☐ Enf. Esp. em Enfermagem de Saúde Materna e Obstétrica
  - ☐ Enf. Esp. em Enfermagem de Saúde Mental e Psiquiátrica
  - ☐ Enf. Esp. em Enfermagem de Saúde Infantil e Pediátrica
  - ☐ Enf. Esp. em Enfermagem Médico-Cirúrgica
  - ☐ Enf. Esp. em Enfermagem de Reabilitação
- 

4. Grau/formação académica  
(especifique a área científica)

Licenciatura. Especifique: \_\_\_\_\_  
Pós graduação. Especifique: \_\_\_\_\_  
Mestrado. Especifique: \_\_\_\_\_  
Doutoramento. Especifique: \_\_\_\_\_

## Parte II

**Seguem-se três grupos de questões sobre conhecimentos e práticas dos enfermeiros relativamente à higiene oral. Pedimos que leia atentamente as questões e responda a todas elas, assinalando com o (X) na ☐ correspondente à sua opção e em texto livre nas questões abertas.**

|                                                                                  |                                                                                                                                                                                                   |                              |                                   |
|----------------------------------------------------------------------------------|---------------------------------------------------------------------------------------------------------------------------------------------------------------------------------------------------|------------------------------|-----------------------------------|
| 1. Alguma vez teve formação sobre higiene oral?                                  | Sim <input type="checkbox"/>                                                                                                                                                                      | Não <input type="checkbox"/> | Não sabe <input type="checkbox"/> |
| 1.1. Se sim, quando recebeu essa formação?                                       | No curso de Enfermagem <input type="checkbox"/><br>Durante uma pós-graduação <input type="checkbox"/><br>Formação contínua <input type="checkbox"/><br>Outra <input type="checkbox"/> Qual? _____ |                              |                                   |
| 2. Considera a higiene oral fundamental para os doentes internados?              | Sim <input type="checkbox"/>                                                                                                                                                                      | Não <input type="checkbox"/> | Não sabe <input type="checkbox"/> |
| 3. Acha que a falta de cuidados de higiene oral pode levar a doenças sistémicas? | Sim <input type="checkbox"/>                                                                                                                                                                      | Não <input type="checkbox"/> | Não sabe <input type="checkbox"/> |
| 3.1. Se sim, quais?                                                              | _____<br>_____<br>_____<br>_____                                                                                                                                                                  |                              |                                   |
| 4. A medicação interfere na saúde oral?                                          | Sim <input type="checkbox"/>                                                                                                                                                                      | Não <input type="checkbox"/> | Não sabe <input type="checkbox"/> |
| 4.1. Se sim, enumere alguns desses medicamentos.                                 | _____<br>_____<br>_____<br>_____                                                                                                                                                                  |                              |                                   |
| 6. Quais são as infeções orais mais comuns nos doentes internados?               | _____<br>_____<br>_____<br>_____                                                                                                                                                                  |                              |                                   |
| 7. Que áreas da cavidade oral necessitam de avaliação periódica?                 | _____<br>_____<br>_____<br>_____                                                                                                                                                                  |                              |                                   |
| 8. As próteses dentárias exigem cuidados de higiene específicos?                 | Sim <input type="checkbox"/>                                                                                                                                                                      | Não <input type="checkbox"/> | Não sabe <input type="checkbox"/> |
| 8.1. Se sim, indique-os.                                                         | _____<br>_____<br>_____                                                                                                                                                                           |                              |                                   |

**Parte III (assinale com um X)**

|                                                                                                                                     | Concordo totalmente | Concordo | Não concordo, nem discordo | Discordo | Discordo totalmente |
|-------------------------------------------------------------------------------------------------------------------------------------|---------------------|----------|----------------------------|----------|---------------------|
| 1. Os enfermeiros são os responsáveis pela prestação de cuidados de higiene oral aos doentes internados em situação de dependência. |                     |          |                            |          |                     |
| 2. Os enfermeiros são responsáveis pela supervisão dos cuidados de higiene oral aos doentes internados.                             |                     |          |                            |          |                     |
| 3. Os cuidados de higiene oral são mais importantes nos doentes internados em situação de dependência.                              |                     |          |                            |          |                     |
| 4. Limpar a cavidade oral é uma tarefa muito desagradável.                                                                          |                     |          |                            |          |                     |
| 5. Os cuidados de higiene oral têm uma importância igual aos restantes cuidados de enfermagem                                       |                     |          |                            |          |                     |
| 6. Eu tenho tempo suficiente para prestar cuidados de higiene oral adequados pelo menos 1 vez por dia.                              |                     |          |                            |          |                     |
| 7. Eu disponho, no meu serviço, dos produtos e materiais necessários à prestação de cuidados de higiene oral.                       |                     |          |                            |          |                     |
| 8. Eu recebi formação adequada para prestar cuidados de higiene oral.                                                               |                     |          |                            |          |                     |
| 9. É difícil limpar a cavidade oral.                                                                                                |                     |          |                            |          |                     |
| 10. A higiene oral não tem impacto na qualidade de vida dos doentes internados em situação de dependência.                          |                     |          |                            |          |                     |
| 11. A existência de doença oral não representa risco para o doente.                                                                 |                     |          |                            |          |                     |
| 12. A doença oral e a respetiva referenciação para um especialista carecem de atenção da equipa multidisciplinar.                   |                     |          |                            |          |                     |

### Parte IV (assinale com X a sua opção)

|                                                                                                                                                     |                                              |                              |                                   |
|-----------------------------------------------------------------------------------------------------------------------------------------------------|----------------------------------------------|------------------------------|-----------------------------------|
| 1. Avalia a necessidade em cuidados de higiene oral nos doentes internados nas primeiras 24 horas?                                                  | Sim <input type="checkbox"/>                 | Não <input type="checkbox"/> | Não sabe <input type="checkbox"/> |
| 2. Documenta no processo clínico do doente o resultado dessa avaliação?                                                                             | Sim <input type="checkbox"/>                 | Não <input type="checkbox"/> | Não sabe <input type="checkbox"/> |
| 3. Existe implementado, no seu serviço, algum protocolo para avaliação das necessidades em cuidados de higiene oral aos doentes internados?         | Sim <input type="checkbox"/>                 | Não <input type="checkbox"/> | Não sabe <input type="checkbox"/> |
| 4. Existe implementado, no seu serviço, algum protocolo para a prestação de cuidados de higiene oral aos doentes internados?                        | Sim <input type="checkbox"/>                 | Não <input type="checkbox"/> | Não sabe <input type="checkbox"/> |
| 5. Quantas vezes presta cuidados de higiene oral aos doentes internados? (assinale a mais frequente)                                                | Nenhuma                                      | <input type="checkbox"/>     |                                   |
|                                                                                                                                                     | 1x/ dia                                      | <input type="checkbox"/>     |                                   |
|                                                                                                                                                     | 2x/dia                                       | <input type="checkbox"/>     |                                   |
|                                                                                                                                                     | ≥ 3x dia                                     | <input type="checkbox"/>     |                                   |
| 6. Quanto tempo demora a prestar cuidados de higiene oral a cada doente? (assinale a mais frequente)                                                | Nenhum                                       | <input type="checkbox"/>     |                                   |
|                                                                                                                                                     | <1min                                        | <input type="checkbox"/>     |                                   |
|                                                                                                                                                     | 1-5min                                       | <input type="checkbox"/>     |                                   |
|                                                                                                                                                     | 5-10min                                      | <input type="checkbox"/>     |                                   |
|                                                                                                                                                     | > 10 min                                     | <input type="checkbox"/>     |                                   |
| 7. Quais as ajudas técnicas habitualmente utilizada para a prestação de cuidados de higiene oral no seu serviço? (pode assinalar mais de uma opção) | Nada                                         | <input type="checkbox"/>     |                                   |
|                                                                                                                                                     | Espátula com compressa                       | <input type="checkbox"/>     |                                   |
|                                                                                                                                                     | Bastão com ponta em espuma                   | <input type="checkbox"/>     |                                   |
|                                                                                                                                                     | Escova de dentes de adulto                   | <input type="checkbox"/>     |                                   |
|                                                                                                                                                     | Escova de dentes pediátrica                  | <input type="checkbox"/>     |                                   |
|                                                                                                                                                     | Escova de dentes com sucção                  | <input type="checkbox"/>     |                                   |
|                                                                                                                                                     | Raspador de língua                           | <input type="checkbox"/>     |                                   |
|                                                                                                                                                     | Pasta de dentes                              | <input type="checkbox"/>     |                                   |
|                                                                                                                                                     | Elixir bucal                                 | <input type="checkbox"/>     |                                   |
|                                                                                                                                                     | Outro: _____                                 | <input type="checkbox"/>     |                                   |
| 8. Qual a prática habitual no seu serviço para prestação de cuidados de higiene oral?                                                               | Nada                                         | <input type="checkbox"/>     |                                   |
|                                                                                                                                                     | Escovagem dos dentes                         | <input type="checkbox"/>     |                                   |
|                                                                                                                                                     | Escovagem das gengivas                       | <input type="checkbox"/>     |                                   |
|                                                                                                                                                     | Escovagem da língua                          | <input type="checkbox"/>     |                                   |
|                                                                                                                                                     | Limpeza das próteses dentárias               | <input type="checkbox"/>     |                                   |
|                                                                                                                                                     | Aplicação de hidratante nos lábios           | <input type="checkbox"/>     |                                   |
|                                                                                                                                                     | Enxaguamento com/utilização de elixir bucal: |                              |                                   |
|                                                                                                                                                     | - Clorexidina                                | <input type="checkbox"/>     |                                   |
|                                                                                                                                                     | - Solução salina                             | <input type="checkbox"/>     |                                   |
|                                                                                                                                                     | - Água                                       | <input type="checkbox"/>     |                                   |
|                                                                                                                                                     | - Cloridrato de Benzidamina                  | <input type="checkbox"/>     |                                   |

|                                                                                                            |                              |                              |                                   |
|------------------------------------------------------------------------------------------------------------|------------------------------|------------------------------|-----------------------------------|
| 9. Acha que o seu hospital proporciona os recursos adequados para a prestação de cuidados de higiene oral? | Sim <input type="checkbox"/> | Não <input type="checkbox"/> | Não sabe <input type="checkbox"/> |
|------------------------------------------------------------------------------------------------------------|------------------------------|------------------------------|-----------------------------------|

**MUITO OBRIGADA PELA COLABORAÇÃO**
